# Supplementary material for: Inhibition of myeloperoxidase oxidant production by N-acetyl lysyltyrosylcysteine amide reduces brain damage in a murine model of stroke
Source: PubMed Central journal article supplement (PMC4879722; doi:10.1186/s12974-016-0583-x), 2016-05-24

# Suppl. Figure 1

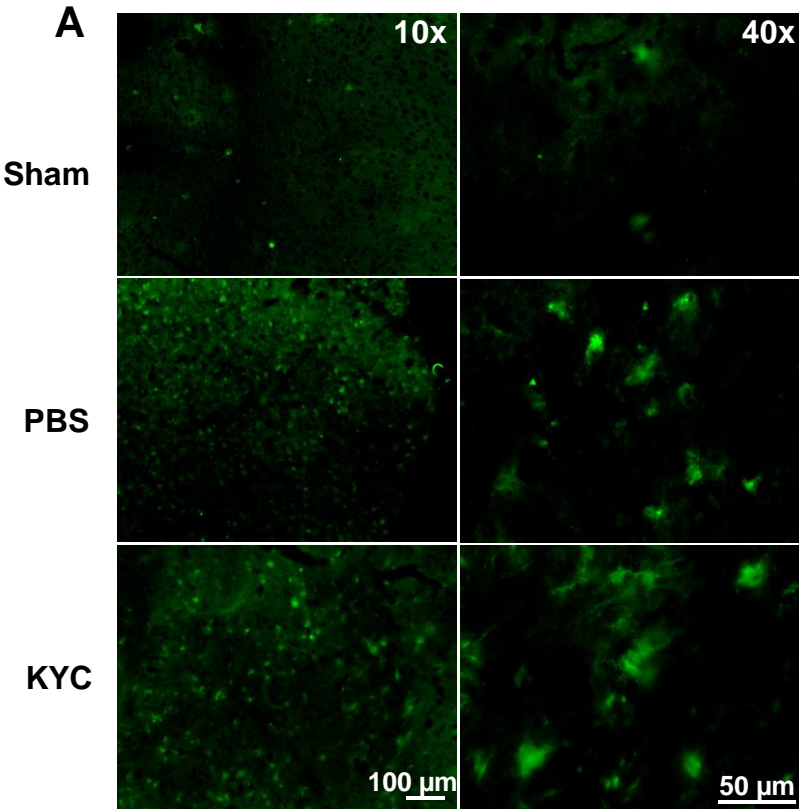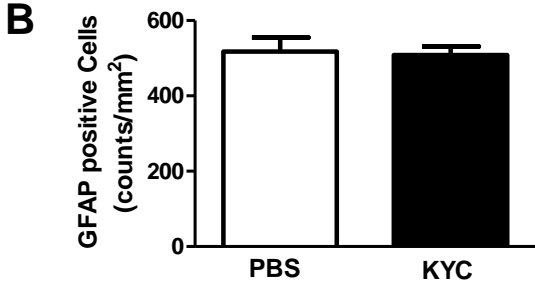

Suppl. Figure 2

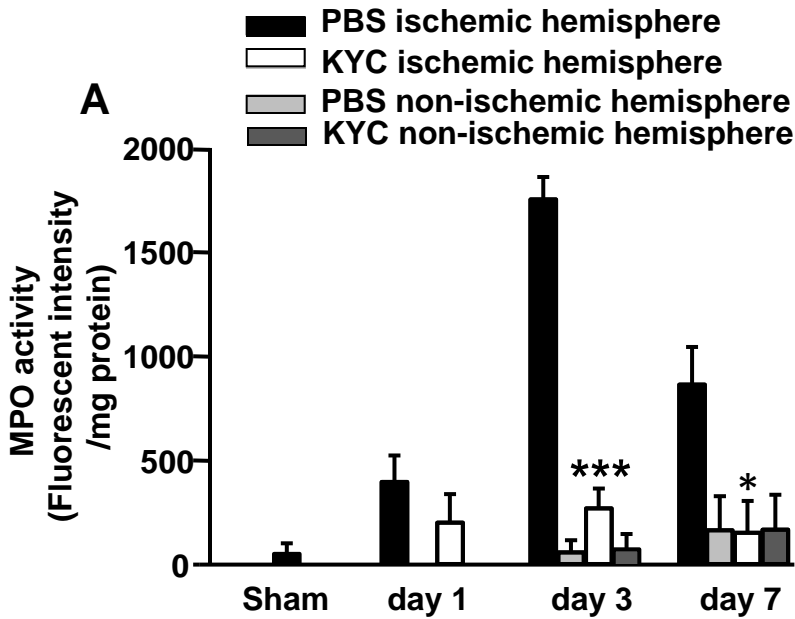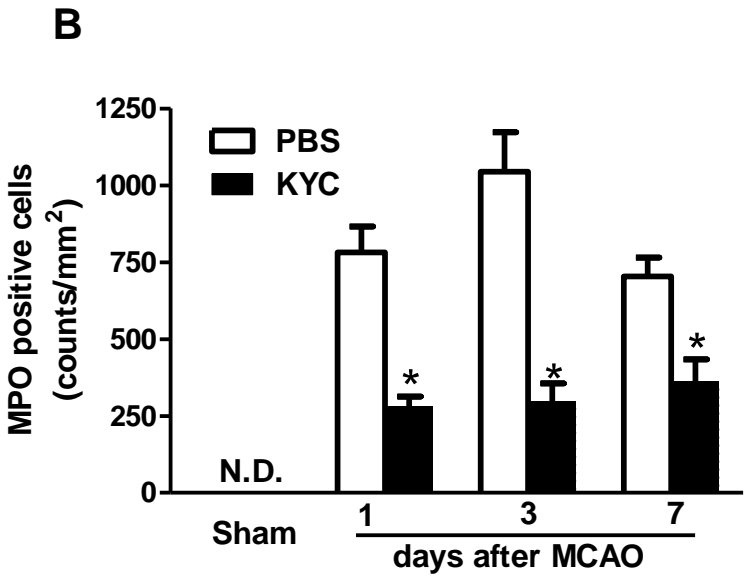

Suppl. Figure 3A

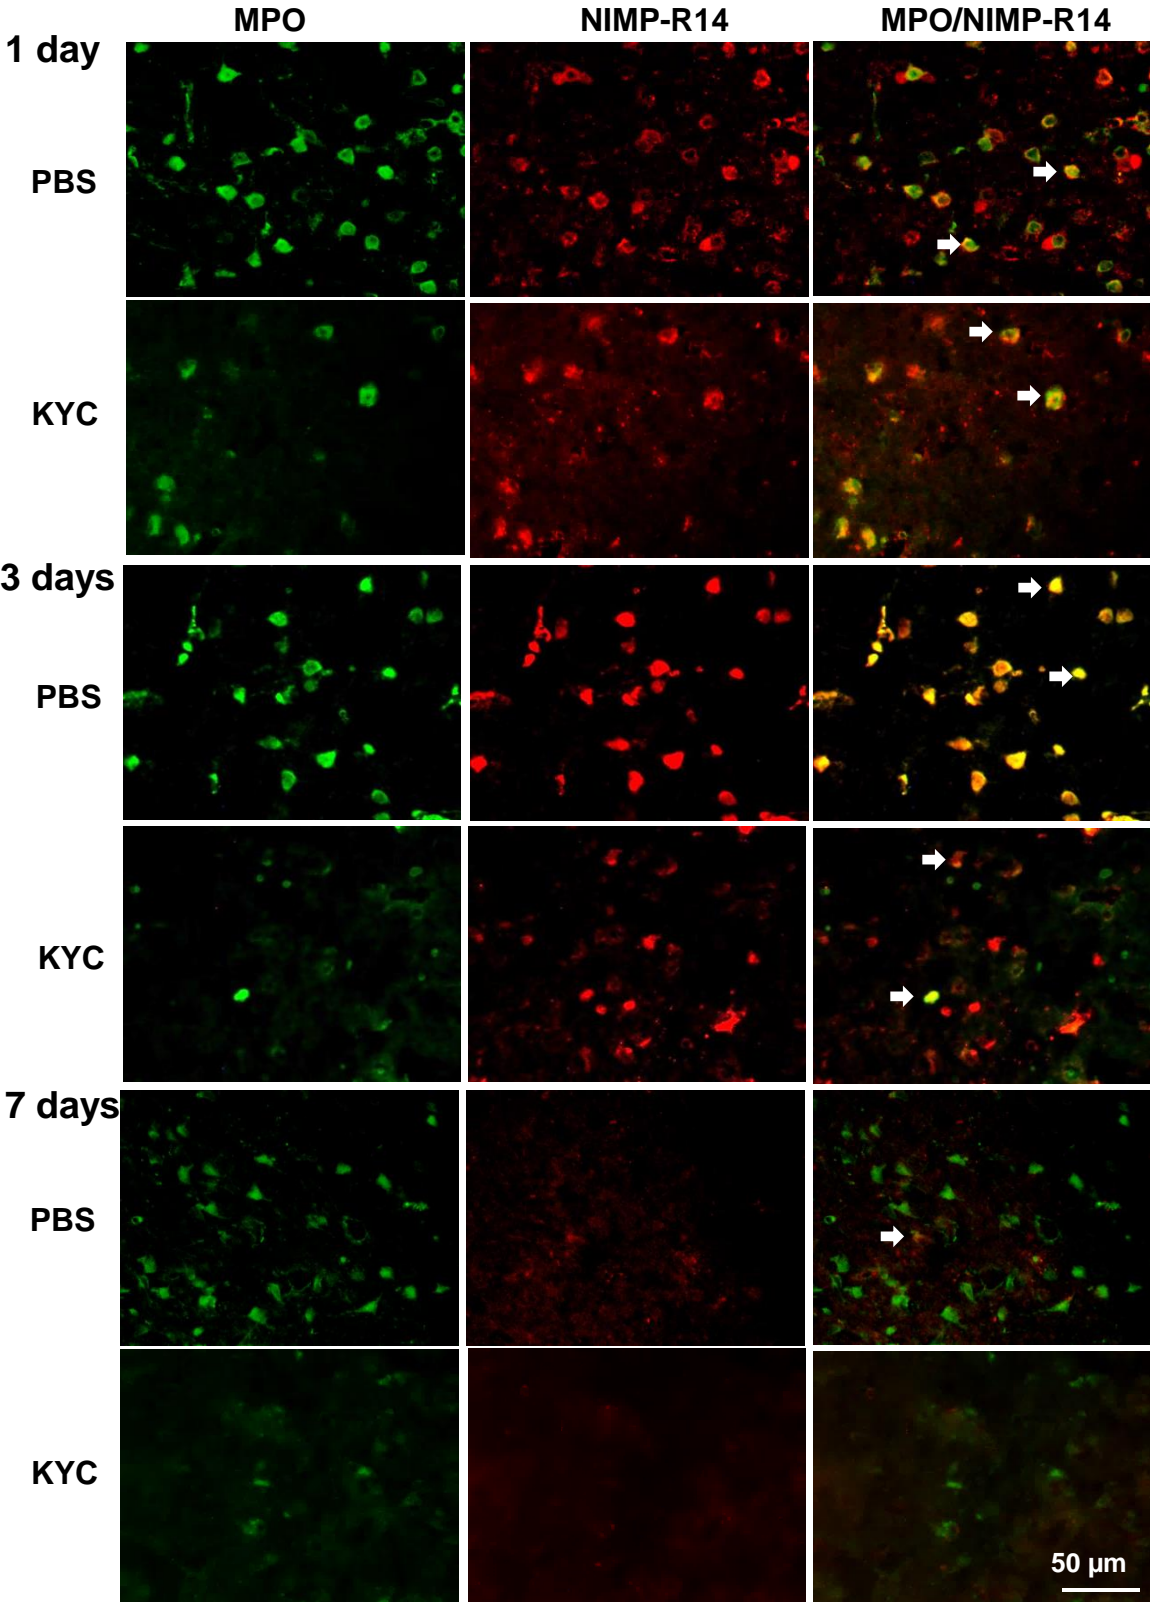

# Suppl. Figure 3B

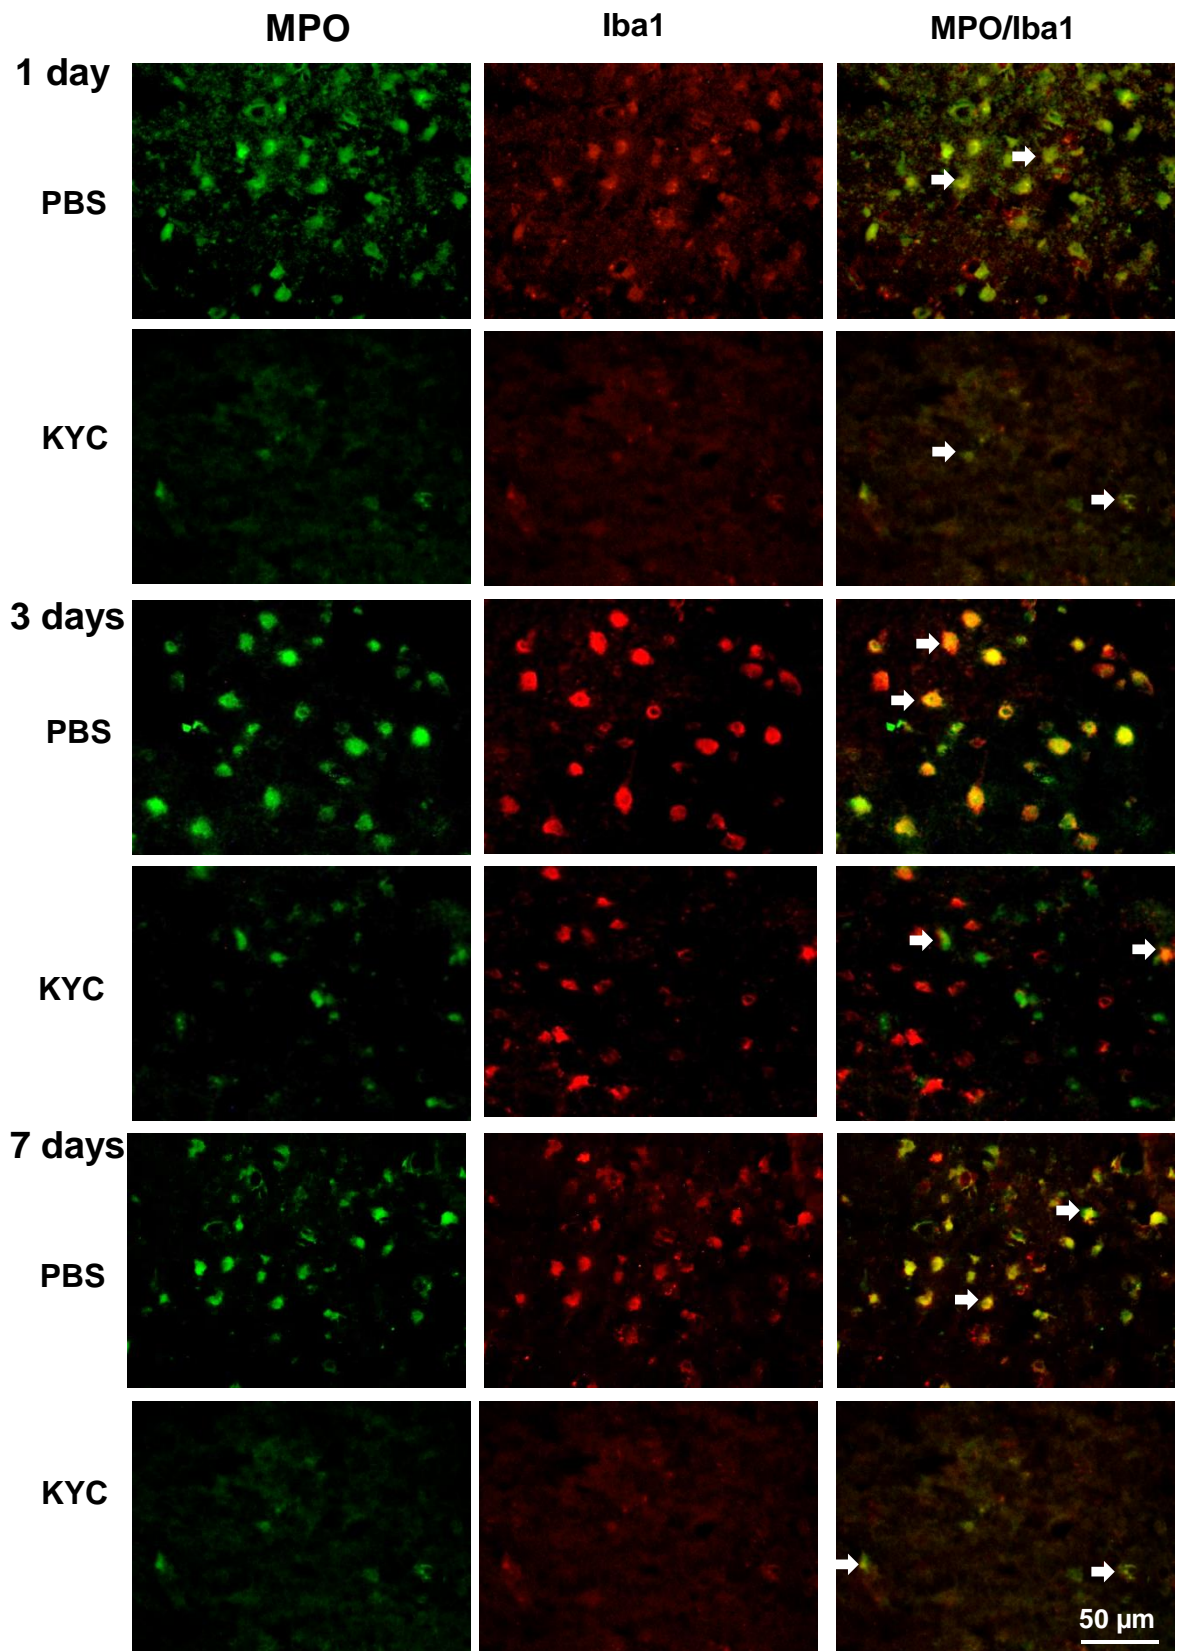

Suppl. Figure 4.

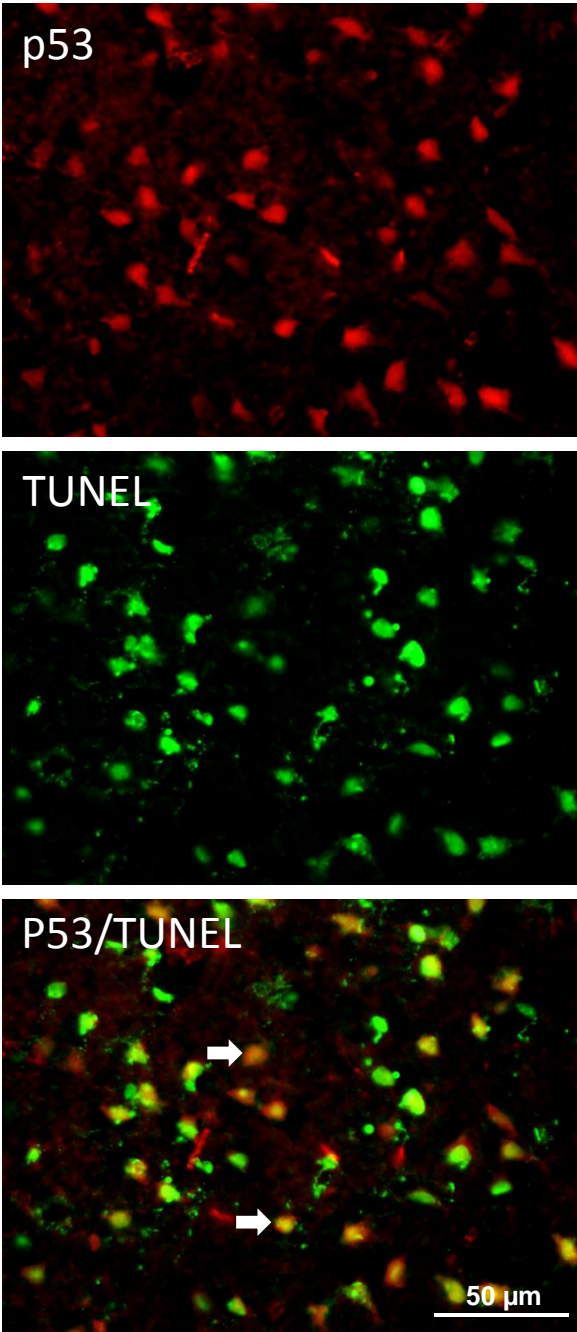

Supplement: 12974_2016_583_MOESM1_ESM.pdf [file 12974_2016_583_MOESM1_ESM.pdf]
